# Supplementary material
Source: publisher figshare collection journal article supplement (https://frontiersin.figshare.com/ndownloader/files/31240966)
Supplement: Supplementary file 1 [file 31240966]

**Supplementary Table 1:** List of some dominant tree species, Density (D, individual ha-1), Basal Area (BA, m2 ha-1) aboveground biomass (AGB Mg ha-1) and important value index (IVI) of the species in different land-uses of northeast India

| **Land-use** | **Species** | **D** | **IVI** | **BA** | **AGB** |
| --- | --- | --- | --- | --- | --- |
| **Forest (tropical)** | *Palaquium polyanthum*(Wall ex G.Don) Baill. | 460 | 27.13 | 8.06 | 17.46 |
| *Ficus racemosa* Roxb. | 325 | 18.28 | 7.11 | 16.71 |
| *Lagerstroemia* sp. | 141 | 15.18 | 2.86 | 12.86 |
| *Sapium sp*. | 98 | 14.45 | 2.00 | 9.32 |
| *Schleichera sp.* | 62 | 13.02 | 1.91 | 5.61 |
| **Forest (sub-tropical)** | *Megacarpaea polyandra* Benth. | 210 | 23.492 | 9.37 | 16.62 |
| *Syzygium sp.* | 165 | 15.080 | 6.11 | 13.22 |
| *Tetrameles nudiflora*  R.Br. | 101 | 14.377 | 4.25 | 9.57 |
| *Sapium sp.* | 82 | 13.174 | 2.21 | 6.33 |
| *Macaranga sp.* | 51 | 12.234 | 1.25 | 4.75 |
| **Forest (temperate)** | *Quercu*s sp. | 62.8 | 20 | 17.0 | 91.0 |
| *Alnus sp.* | 56.7 | 19 | 3.9 | 15.6 |
| *Illicium griffithii* Hook & Thomp. | 47.8 | 18 | 1.1 | 3.8 |
| *Rhododendron sp.* | 44.4 | 15 | 2.0 | 5.3 |
| *Castonopsis hystrix*A.DC | 38.3 | 14 | 7.1 | 32.3 |
| *Acer sp.* | 18.9 | 8 | 1.8 | 5.2 |
| *Pinus wallichiana* A.B. Jacks | 11.1 | 6 | 1.1 | 5.1 |
| *Quercus myrsinifolia* Blume | 8.9 | 5 | 1.2 | 6.2 |
| *Rhododendron hodgsonii* Hook. | 6.7 | 4 | 0.6 | 1.4 |
| *Elaeocarpus rugosus* Wall. | 6.7 | 4 | 0.5 | 1.8 |
| **Forest (bamboo)** | *Melocanna baccifera* (Roxb.) Kurz | 26540 | 300 | 12.31 | 39.75 |
| **Plantation (tropical)** | *Areca catechu* L. | 1580 | 300 | 18.10 | 24.21 |
| *Hevea brasiliensis* (Willd ex. A. Juss) | 780 | 300 | 31.20 | 143.83 |
| **Plantation (sub-tropical)** | *Pinus kesiya* Royle ex Gordon | 690 | 300 | 24.58 | 125.89 |
| **Shifting cultivation**  **(<5 years)** | *Albizia procera*(Rxb) Benth | 3 | 28 | 0.09 | 0.41 |
| *Artocarpus chaplasha* Roxb. | 1 | 19.01 | 0.06 | 0.04 |
| *Bauhnia variegate* L. | 3 | 17.93 | 0.01 | 0.23 |
| *Callicarpa arborea* Roxb | 7 | 50.65 | 0.05 | 0.25 |
| *Emblica officinalis* L. | 3 | 26.76 | 0.03 | 0.13 |
| *Gmelina arborea* Roxb. | 2 | 16.68 | 0.11 | 0.53 |
| *Macaranga indica* Wight | 3 | 17.93 | 0.01 | 0.04 |
| *Anthocephalus chinensis* Walp. | 5 | 20.10 | 0.01 | 0.06 |
| *Artocarpus chaplasha* Roxb. | 3 | 19.24 | 0.02 | 0.06 |
| *Bauhnia variegata* L. | 7 | 27.07 | 0.02 | 0.07 |
| *Bischofia javanica*Blume | 1 | 17.69 | 0.02 | 0.08 |
| *Bombax ceiba* L. | 1 | 17.69 | 0.03 | 0.12 |
| *Callicarpa arborea* Roxb | 5 | 25.67 | 0.33 | 1.71 |
| *Ficus racemosa* L. | 3 | 19.87 | 0.16 | 0.74 |
| *Gmelina arborea* Roxb. | 2 | 12.81 | 0.15 | 0.75 |
| *Macaranga denticulate* (Blume) Mull.Arg. | 6 | 20.99 | 0.09 | 0.47 |
| *Rhus chinensis* Mill. | 4 | 31.45 | 0.03 | 0.14 |
| *Tectona grandis* Lf. | 1 | 17.69 | 0.16 | 0.85 |
| **Shifting cultivation (11-20 years)** | *Adina cordifolia* (Roxb.) Hook. f. | 3 | 7.45 | 0.41 | 2.02 |
| *Calliandra umbrosa* (Wall.) Benth. | 1 | 13.14 | 0.32 | 1.51 |
| *Callicarpa arborea* Roxb | 17 | 27.07 | 0.93 | 5.03 |
| *Castanopsis tribuloides*(Sm.) A. DC. | 3 | 7.45 | 0.32 | 1.58 |
| *Derris robusta* (DC.) Benth. | 4 | 11.94 | 0.89 | 4.91 |
| *Heritiera papilio* Bedd. | 3 | 12.32 | 0.13 | 0.65 |
| *Lagerstroemia speciosa* (L.) Pers. | 1 | 13.64 | 1.31 | 6.99 |
| *Mesua ferrea* Linn. | 15 | 23.17 | 0.16 | 0.76 |
| *Rhus chinensis* Mill. | 5 | 11.91 | 0.44 | 2.37 |
| *Sycopsis griffithiana* Oliv. | 4 | 11.94 | 0.19 | 0.94 |
| **Agroforestry systems** | *Aquilaria malaccensis* Lamk. | 2500 | 57.19 | 15.55 | 74.71 |
| *Areca catechu* L. | 760 | 36.07 | 7.68 | 18.25 |
| *Toona ciliata* M.Roem. | 120 | 27.28 | 7.04 | 32.01 |
| *Grewia nervosa* (Lour.) Panigrahi | 105 | 19.45 | 1.33 | 5.88 |
| *Mangifera indica* L. | 45 | 14.81 | 2.66 | 17.26 |
